# Supplementary material
Source: publisher figshare collection journal article supplement (https://gsajournals.figshare.com/ndownloader/files/12389015)
Supplement: Supplementary file 1 [file 12389015]

## Sheet: Sheet1
Table S6: Assembly completeness assessment for both heterochromatin and euchromatin using genome assembly alignments to reference 5.57, following McCoy et al. (2014) but modified by Berlin et al. (2015), and Koren et al. (2017).
Chromosomal Arms*		dbg2olc	canu	qm2x	bionano	Koren et al.	Assembly Differences Columns F & G
X	# of alignments	59	76	46	41	131
22422827	Alignment Length	21922414	22111590	22039920	22039920	22250005
	% Aligned	0.977683	0.9861	0.9829	0.9829	0.9923	-0.0094
2L	# of alignments	44	59	35	28	127
23011544	Alignment Length	22648059	22878838	22876174	22876174	22953434
	% Aligned	0.9842	0.9942	0.9941	0.9941	0.9975	-0.0034
2R	# of alignments	44	66	40	34	109
21146708	Alignment Length	20958356	21043422	21043571	21043571	21112867
	% Aligned	0.9911	0.9951	0.9951	0.9951	0.9984	-0.0033
3L	# of alignments	49	68	41	38	128
24543557	Alignment Length	24327028	24443201	24413691	24413691	24531985
	% Aligned	0.9912	0.9959	0.9947	0.9947	0.9995	-0.0048
3R	# of alignments	46	62	36	33	138
27905053	Alignment Length	27781216	27864079	27866094	27866094	27877776
	% Aligned	0.9956	0.9985	0.9986	0.9986	0.999	-0.0004
4	# of alignments	13	13	11	11	21
1351857	Alignment Length	1296254	1309520	1315230	1315230	1324125
	% Aligned	0.9589	0.9687	0.9729	0.9729	0.9795	-0.0066
Xhet	# of alignments	5	8	8	8	19
204112	Alignment Length	179997	193672	193055	193055	203174
	% Aligned	0.8819	0.9489	0.9458	0.9458	0.9954	-0.0496
2LHet	# of alignments	8	10	12	12	31
368872	Alignment Length	285773	272543	268768	268768	297866
	% Aligned	0.7747	0.7389	0.7286	0.7286	0.8075	-0.0789
2RHet	# of alignments	48	38	29	24	63
3288761	Alignment Length	2429683	2568176	2589329	2586762	2662586
	% Aligned	0.7388	0.7809	0.7873	0.7865	0.8096	-0.0231
3LHet	# of alignments	35	32	31	29	66
2555491	Alignment Length	2192994	2269649	2277691	2277691	2388018
	% Aligned	0.8581	0.8881	0.8913	0.8913	0.9345	-0.0432
3RHet	# of alignments	40	38	32	27	62
2517507	Alignment Length	1865241	2171156	2176177	2176177	2245173
	% Aligned	0.7409	0.8624	0.8644	0.8644	0.8918	-0.0274
YHet	# of alignments	0	1	1	1	19
347038	Alignment Length	0	15240	15240	15240	209481
	% Aligned	0	0.0439	0.0439	0.0439	0.6036	-0.5597
Mitochondria	# of alignments	0	0	0	0	0
19517	Alignment Length	0	0	0	0	0
	% Aligned	0	0	0	0	0	0
U	# of alignments	119	157	149	132	249
10049037	Alignment Length	2192210	2877651	2910229	2910229	6200077
	% Aligned	0.2182	0.2864	0.2896	0.2896	0.617	-0.3274
*alignments of at least 99% identity and 1000 bp						Euchromatic Regions
						Average	-0.0047
						Min	-0.0094
						Max	-0.0004
						Heterchromatic Regions (except Y, M and U)
						Average	-0.0444
						Min	-0.0789
						Max	-0.0231
